# Supplementary material
Source: Elsevier journal article supplement (https://www.sciencedirect.com/science/article/pii/S0001731019300638)
Supplement: mmc1 [file S0001731019300638:mmc1.pdf]

## MATERIAL SUPLEMENTARIO

**Tabla 1: Descripción de las complicaciones**

|                                          |                                                                                                                                                                                                                                                                                                                                                                                                                                                                                                                                                                                                                                                                                                                                                                                                                                                                                                                                                                                                                                                                                                                                                           |
|------------------------------------------|-----------------------------------------------------------------------------------------------------------------------------------------------------------------------------------------------------------------------------------------------------------------------------------------------------------------------------------------------------------------------------------------------------------------------------------------------------------------------------------------------------------------------------------------------------------------------------------------------------------------------------------------------------------------------------------------------------------------------------------------------------------------------------------------------------------------------------------------------------------------------------------------------------------------------------------------------------------------------------------------------------------------------------------------------------------------------------------------------------------------------------------------------------------|
| Seroma                                   | Colección de grasa licuada, linfa y suero debajo de la herida quirúrgica, que se produce en los tres meses siguientes a la cirugía. Es una tumefacción bien localizada, con fluctuación y molestias locales.                                                                                                                                                                                                                                                                                                                                                                                                                                                                                                                                                                                                                                                                                                                                                                                                                                                                                                                                              |
| Infección de la herida quirúrgica (IHQ)  | Se produce en los 30 días que siguen a la cirugía. Es aquella en la que se cumple una o más de los siguientes criterios: a) drenaje purulento b) aislamiento del microorganismo en un fluido o tejido; c) diagnóstico de IHQ por un médico d) uno o más de los siguientes signos o síntomas de infección: dolor, inflamación, eritema, calor o que el cirujano haya abierto deliberadamente la herida quirúrgica, excepto si el cultivo es negativo; e) dehiscencia de suturas espontánea o deliberadamente por el médico cuando el paciente tiene, al menos, uno de los siguientes signos o síntomas: fiebre ( $> 38^{\circ}\text{C}$ ), dolor localizado, irritabilidad a la palpación, a menos que el cultivo sea negativo, f) absceso u otra evidencia de infección que afecte la incisión profunda mediante la exploración física o con una prueba de imagen.<br>Puede ser superficial si afecta únicamente la piel y los tejidos blandos subcutáneos a la incisión, en cuyo caso se aplicarán los criterios a, b, c y d, o profunda si afecta tejidos blandos profundos (fascia y músculo), en cuyo caso se aplicarán los criterios a, b, c, e y f. |
| Hematoma                                 | Colección de sangre subcutánea. Se presenta como una tumefacción localizada, de coloración variable, que produce dolor y molestias locales. Se produce en los 20 días tras la cirugía                                                                                                                                                                                                                                                                                                                                                                                                                                                                                                                                                                                                                                                                                                                                                                                                                                                                                                                                                                     |
| Dehiscencia de la herida                 | Apertura y separación de los bordes de la herida, relacionada o no con infección de la misma, en los 3 primeros meses tras la cirugía.                                                                                                                                                                                                                                                                                                                                                                                                                                                                                                                                                                                                                                                                                                                                                                                                                                                                                                                                                                                                                    |
| Linfedema                                | Acumulación de linfa en los espacios intersticiales de las extremidades, que hace aumentar su volumen y desaparecer en mayor o menor grado los pliegues de la piel. Puede aparecer en los primeros meses tras la cirugía o hasta un año después                                                                                                                                                                                                                                                                                                                                                                                                                                                                                                                                                                                                                                                                                                                                                                                                                                                                                                           |
| Alteraciones de la cicatrización         | En este apartado se incluye la formación de queloides, heridas atróficas y la formación de heridas fibrosas durante el primer año tras la cirugía.                                                                                                                                                                                                                                                                                                                                                                                                                                                                                                                                                                                                                                                                                                                                                                                                                                                                                                                                                                                                        |
| Alteraciones sensitivas                  | Se incluyen hipoestesia, anestesia, pérdida completa de la sensibilidad, hipoalgesia, parestesias, disestesias, hiperestesia, alodinia e hiperalgesia, que aparezcan el primer año tras la cirugía                                                                                                                                                                                                                                                                                                                                                                                                                                                                                                                                                                                                                                                                                                                                                                                                                                                                                                                                                        |
| Infección del tracto urinario nosocomial | Sintomatología compatible con ITU que precisó de tratamiento antibiótico en los 30 días siguientes a la cirugía.                                                                                                                                                                                                                                                                                                                                                                                                                                                                                                                                                                                                                                                                                                                                                                                                                                                                                                                                                                                                                                          |
| Linforragia                              | Derrame de linfa proveniente de vasos linfáticos seccionados o rotos                                                                                                                                                                                                                                                                                                                                                                                                                                                                                                                                                                                                                                                                                                                                                                                                                                                                                                                                                                                                                                                                                      |

**Tabla 2: Classification of Surgical Complications. Tomada de Dindo et al. <sup>14</sup>.**

| <b>Grade</b> | <b>Definition</b>                                                                                                                                                                                                                                                                                                                                            |
|--------------|--------------------------------------------------------------------------------------------------------------------------------------------------------------------------------------------------------------------------------------------------------------------------------------------------------------------------------------------------------------|
| Grade I      | Any deviation from the normal postoperative course without the need for pharmacological treatment or surgical, endoscopic, and radiological interventions.<br>Allowed therapeutic regimens are: drugs as antiemetics, antipyretics, analgesics, diuretics, electrolytes, and physiotherapy. This grade also includes wound infections opened at the bedside. |
| Grade II     | Requiring pharmacological treatment with drugs other than such allowed for grade I complications<br>Blood transfusions and total parenteral nutrition are also included                                                                                                                                                                                      |
| Grade III    | Requiring surgical, endoscopic or radiological intervention                                                                                                                                                                                                                                                                                                  |
| Grade IIIa   | Intervention not under general anaesthesia                                                                                                                                                                                                                                                                                                                   |
| Grade IIIb   | Intervention under general anaesthesia                                                                                                                                                                                                                                                                                                                       |
| Grade IV     | Life-threatening complication (including CNS complications) *requiring IC/ICU management                                                                                                                                                                                                                                                                     |
| Grade IVa    | Single organ dysfunction (including dialysis)                                                                                                                                                                                                                                                                                                                |
| Grade IVb    | Multiorgan dysfunction                                                                                                                                                                                                                                                                                                                                       |
| Grade V      | Death of a patient                                                                                                                                                                                                                                                                                                                                           |
| Suffix “d”   | If the patient suffers from a complication at the time of discharge, the suffix “d” (for disability) is added to the respective grade of complication. This label indicates the need for a follow-up to fully evaluate the complication.                                                                                                                     |

\*Brain haemorrhage, ischemic stroke, subarachnoidal bleeding, but excluding transient ischemic attacks.  
CNS, central nervous system; IC, intermediate care; ICU, intensive care unit.
